1 **Title**

2 Comparison of odor responses of homologous medial and lateral glomeruli mapped in the  
3 olfactory bulb of the mouse

4

5 **Abbreviated title**

6 Functional imaging of medial/lateral glomeruli

7

8 **Author names and affiliations**

9 Tokiharu Sato<sup>1,2</sup>, Ryota Homma<sup>1</sup>, Shin Nagayama<sup>1</sup>

10 <sup>1</sup>Department of Neurobiology and Anatomy, McGovern Medical School at the University of  
11 Texas Health Science Center at Houston, Houston, TX 77030, USA

12 <sup>2</sup>Department of System Pathology for Neurological Disorders, Brain Research Institute, Niigata  
13 University, Niigata 951-8585, Japan

14

15 **Correspondence should be addressed to**

16 Shin Nagayama

17 P.O. Box 20708

18 Houston, TX 77225-0708

19 Shin.Nagayama@uth.tmc.edu

20

20 **Impact Statement**

21 This study used *in vivo* calcium imaging to document the odor-evoked responses in paired  
22 glomeruli, demonstrating that activation in medial glomeruli more strongly impacts respiratory-  
23 linked odor processing.

24

25 **Funding**

26 S.N. is supported by NIH/NIDCD grant R01DC013802.

27

28 **Competing interests**

29 All authors declare no conflicts of interest.

30

31 **Author contributions**

32 TS, Conceptualization, Data curation, Formal analysis, Writing—original draft, Writing—review  
33 and editing; RH, Methodology, Formal analysis, Writing—review and editing; SN,  
34 Conceptualization, Supervision, Writing—original draft, Writing—review and editing

35

35 **Abstract**

36 Olfactory sensory neurons expressing same-type odorant receptors typically project to a pair of  
37 glomeruli in the medial and lateral sides of the olfactory bulbs (OBs) in rodents. However, their  
38 functional properties remain unclear, because the majority of medial glomeruli are hidden in the  
39 septal OB. Recently, trace amine-associated odorant receptors were identified that project to a  
40 pair of glomeruli uniquely located in the dorsal OB. We measured the odorant-induced calcium  
41 responses of these glomeruli simultaneously and found that they exhibited similar temporal  
42 response patterns. However, the medial glomeruli had significantly larger respiration-locked  
43 calcium fluctuations than the lateral glomeruli. This trend was observed with/without odorant  
44 stimulation in postsynaptic neurons but not in presynaptic sensory axon terminals. This indicates  
45 that the medial rather than the lateral OB map enhances the respiration-locked rhythm and  
46 transfers this information to higher brain centers.

## 47 **Introduction**

48 Parallel processing of multiple streams of information improves the speed of processing and  
49 provides redundancy for fail-safe operations. Biological parallel streams of information in the  
50 brain are not typically identical neuronal circuits but have unique as well as common properties  
51 (Kandel et al., 2013). How the brain organizes the distinct processing streams and combines  
52 them is not well understood.

53 Odor information is represented as spatial/temporal glomerular activity patterns on the  
54 surfaces of the olfactory bulbs (OBs). In rodents, olfactory sensory neurons (OSNs) expressing  
55 the same types of odorant receptors, among ~1,000 repertoires (Buck, 1996), convert chemical  
56 signals into electrical signals in a respiratory rhythm and project to approximately two glomeruli  
57 in the OB: one on the medioventral side and the other on the dorsolateral side. The axons of  
58 these OSN projections traverse the medial/septal and lateral surfaces of the OBs, respectively.  
59 Because the two homologous glomeruli are arranged symmetrically in the OB, odor information  
60 is represented and processed in two mirror maps (Mombaerts et al., 1996; Nagao et al., 2002,  
61 2000; Zapiec and Mombaerts, 2015). The paired glomeruli are connected via axon collaterals of  
62 tufted cells in a point-to-point manner (Belluscio et al., 2002; Lodovichi et al., 2003; Marks et al.,  
63 2006). Although the anatomical arrangements of the two maps have been studied, less is known  
64 about the functional connections between them (Zhou and Belluscio, 2012, 2008). One pivotal  
65 idea is that the complex structure of the olfactory epithelium (OE) affects the sensitivity and  
66 timing of odorant responses of OSNs such that a delayed odorant response in one of the maps  
67 occurs with low odor concentrations (Kimbell et al., 1997; Schoenfeld and Cleland, 2006; Zhao  
68 et al., 2006; Zhou and Belluscio, 2012). The similarity in the spatiotemporal patterns  
69 representing odor information between these glomeruli remains unknown, partly because of the



70 inaccessibility of the medial map, but is essential to understand the features that are common and  
71 uncommon between the two streams.

72 Trace amine-associated receptors (TAARs) were recently recognized as a second group  
73 gene family of odorant receptors (Liberles and Buck, 2006). Pairs of OSNs expressing TAARs  
74 project to glomeruli in the mediodorsal OB (Dewan et al., 2013; Liberles, 2015; Pacifico et al.,  
75 2012; Zhang et al., 2013), which can frequently be observed simultaneously. Moreover, these  
76 two glomeruli are functionally identifiable because of their highly selective responses to the  
77 specific odorant at a low concentration (Zhang et al., 2013). In the present study, we measured  
78 simultaneous odorant responses of these homologous glomerular pairs and compared the  
79 response properties between medial and lateral maps. These glomeruli exhibited similar activity  
80 patterns of response onset latency, rise and decay times, and amplitudes. However, the medial  
81 glomeruli showed significantly larger respiration-locked fluctuations than the lateral glomeruli.  
82 The difference was observed in postsynaptic neuronal responses but not presynaptic terminal  
83 activity, suggesting that despite similar inputs, the medial map neurons and/or circuits enhance  
84 the respiration-locked activity for further odor information processing.

## 85 **Results**

### 86 **Expression patterns of GCaMP3 in OBs from Cre mouse driver lines.**

87 We recorded odor-evoked neuronal activity in the OBs of mice from multiple transgenic mouse  
88 lines. To express the genetically encoded calcium indicator GCaMP3 (Tian et al., 2009) in  
89 different types of neurons in the OB, we used four Cre recombinase (Cre)-driver mouse lines.  
90 Specifically, OMP-Cre (Li et al., 2004), Gad2-Cre (Taniguchi et al., 2011), DAT-Cre (Bäckman  
91 et al., 2006), and Pcdh21-Cre (Nagai et al., 2005) mouse lines were crossed with a Cre-inducible  
92 GCaMP3 reporter mouse line (Ai38) (Zariwala et al., 2012) so that GCaMP3 was expressed in  
93 OSNs and GABAergic, dopaminergic, and mitral/tufted cells, respectively. We first verified the  
94 GCaMP3 expression pattern in each of the Cre-driver mouse lines (Fig. 1 A–D). In OMP-Cre  
95 mice, GCaMP3 signals were clearly detected only in OSNs in the glomerular layer (GL) (Fig.  
96 1A). Consistent with a previous report (Wachowiak et al., 2013), GCaMP3 in Gad2-Cre mice  
97 was strongly expressed in the external plexiform layer (EPL) and in the granule cell layer (GCL);  
98 the expression was predominantly by granule cells, but enhanced detection methods also  
99 revealed expression by periglomerular cells in the GCL (Fig. 1B). In DAT-Cre mice, GCaMP3  
100 signals were mostly restricted to the GL (Fig. 1C). High magnification of this layer indicated that  
101 GCaMP3 was expressed by juxtglomerular cells, which were considered to be short-axon (SA)  
102 cells (Kiyokage et al., 2010) (inset of Fig. 1C). This pattern of expression was similar to that in  
103 the TH (tyrosine hydroxylase)-Cre line, another driver line for expression in dopaminergic cells  
104 (Wachowiak et al., 2013). In Pcdh21-Cre mice, GCaMP3 was specifically expressed in  
105 mitral/tufted cells, as GCaMP3 signals appeared in somata and neurite processes in superficial  
106 EPL and the mitral cell layer (MCL) (Fig. 1D), as reported previously (Huang et al., 2013;

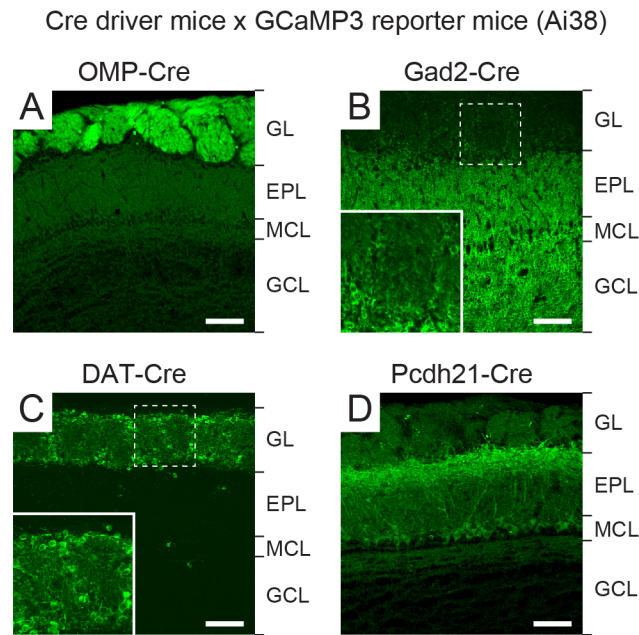

Figure 1: Cell-type-specific expression of GCaMP3 in OBs of mice from different transgenic lines. (A–D) Confocal images of OBs in Cre-dependent GCaMP3 reporter mice crossed with OMP-Cre (A), Gad2-Cre (B), DAT-Cre (C), and Pcdh21-Cre (D) mice. Magnified views of the dashed squares are shown in the insets in B and C. GL, EPL, MCL, and GCL indicate glomerular layer, external plexiform layer, mitral cell layer, and granule cell layer, respectively. Scale bars, 100  $\mu$ m.

107 Mizuguchi et al., 2012; Nagai et al., 2005). Although reporter expression is induced in OSNs in  
108 another Pcdh21-Cre-driver line (Wachowiak et al., 2013), we did not observe this ectopic  
109 expression in our mice. In summary, these Cre mouse lines exhibited the expected cell-type-  
110 specific GCaMP3 expression patterns.

111

### 112 **Identification of homologous glomeruli in medial and lateral maps.**

113 *In vivo* optical imaging of the dorsal OB has not been utilized as a means to record activity in the  
114 medial map, because most of the glomeruli are located in the medioventral region of the OB  
115 (Inaki et al., 2002; Johnson et al., 2009, 2005, 2004, 1999, 1995, Johnson and Leon, 2000, 1996;  
116 Mori et al., 2006; Nagao et al., 2000, 2002; Taniguchi et al., 2003; Zapiec and Mombaerts, 2015).  
117 However, it was recently demonstrated that OSNs expressing TAARs project to two or a few  
118 glomeruli in caudal regions of the dorsal OB (Dewan et al., 2018, 2013; Johnson et al., 2012;  
119 Liberles, 2015; Pacifico et al., 2012; Zhang et al., 2013). These medial and lateral glomeruli can  
120 easily be identified, because axons from TAAR-expressing OSNs projecting to the dorsomedial  
121 glomeruli transverse the anteromedial (septal) surface of the OB, whereas those projecting to the  
122 dorsolateral glomeruli transverse the anterolateral surface. The axonal trajectories and odorant  
123 response profiles of glomeruli receiving projections from OSNs expressing TAAR3 and TAAR4  
124 are well characterized (Dewan et al., 2018, 2013; Pacifico et al., 2012; Zhang et al., 2013).  
125 Specifically, these glomeruli are highly sensitive to isopentylamine (IPA) and phenylethylamine  
126 (PEA), respectively. Therefore, we imaged simultaneously these medial and lateral glomeruli  
127 that receive input from TAAR3- and TAAR4-expressing OSNs.

128         Using IPA and PEA at final concentrations of 0.02% and 0.002%, which reliably and  
129 specifically induce activation of the glomeruli receiving inputs from TAAR3- and TAAR4-

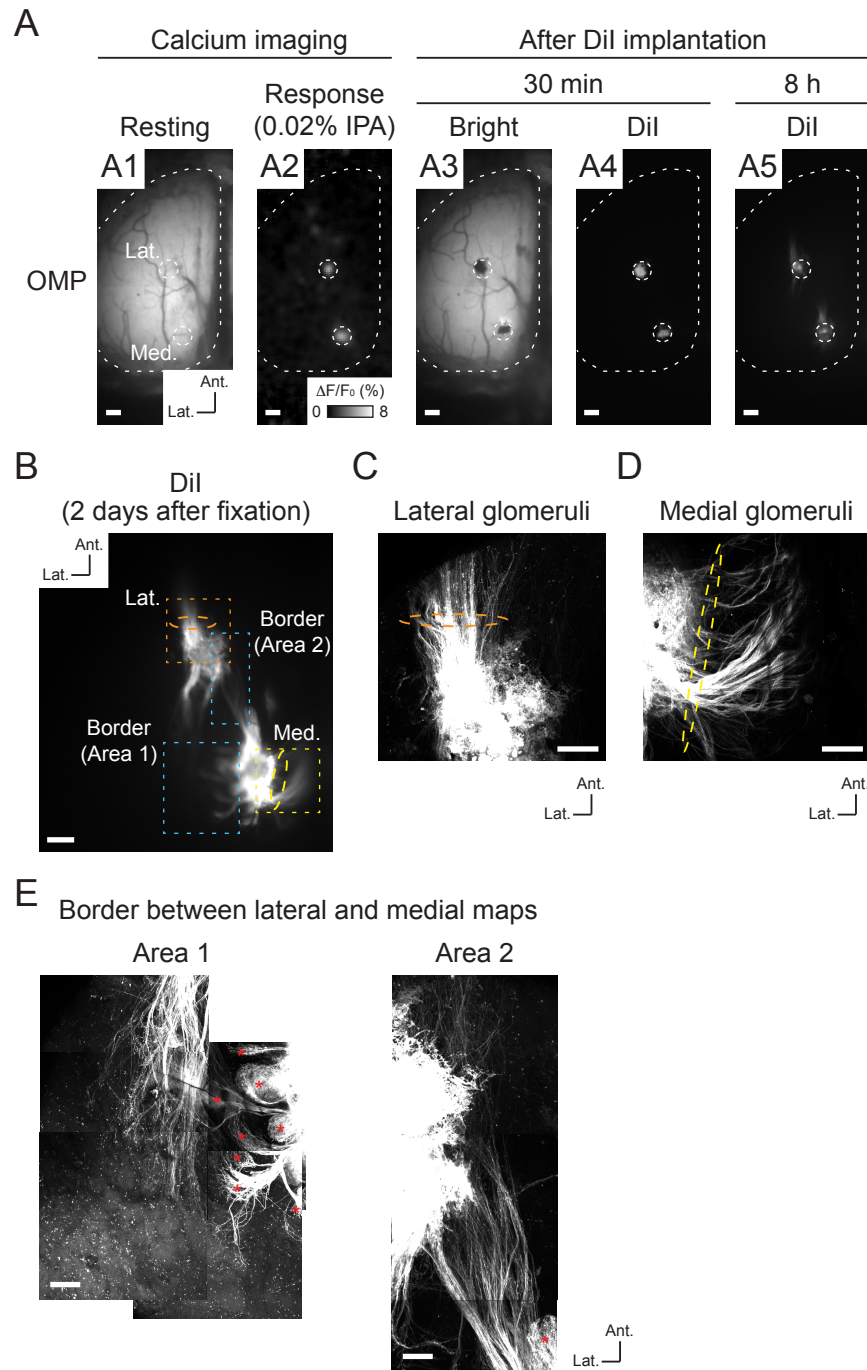

Figure 2: OSN axon trajectories for IPA-responsive glomeruli.

(A) Process for the DiI labeling of OSN axons. A1, resting fluorescence of GCaMP3 in the dorsal OB of OMP-Cre mouse; A2, IPA (0.02%)-responsive homologous glomeruli were observed by calcium imaging (color scale indicates  $\Delta F/F_0$  [%] of GCaMP3 signal); A3, brightfield image after DiI implantation; A4, DiI fluorescence 30 min after DiI implantation; A5, DiI fluorescence 8 h after DiI implantation. The locations of IPA-responsive glomeruli are indicated by the white dotted circles. (B) Two-photon microscopy image of DiI-labeled glomeruli and OSN axons 2 days after DiI implantation. (C) Magnified image of area denoted by orange dotted square in B associated with lateral glomerulus. (D) Magnified image of area denoted by yellow dotted square in B associated with medial glomerulus. Two-photon microscopy images of OSN axons that transverse the lateral and medial surface of OB; orange and yellow dotted ellipses (in B, C, and D) represent major axonal projections from lateral and medial glomeruli. (E) Two-photon microscopy images of areas of lateral/medial border denoted by blue dotted square in B. Red asterisks indicate axon termination in several glomeruli in which the labeled OSNs probably passed through the surface of the DiI-implanted glomeruli. Some minor axons which did not show clear axon terminations in a glomerulus were observed in area 2 in this case. Ant., anterior. Lat., lateral. Scale bars, 200  $\mu\text{m}$  in A and B, 50  $\mu\text{m}$  in C and D, 100  $\mu\text{m}$  in E.

130 expressing OSNs, respectively (Dewan et al., 2018, 2013; Pacifico et al., 2012; Zhang et al.,  
131 2013), we identified distinct pairs of glomeruli comprising OSNs and GABAergic, dopaminergic,  
132 and mitral/tufted cells in the caudal areas of the dorsal OB (Fig. 2A and Fig. 3A). The locations  
133 of these homologous glomeruli are consistent with the positions of glomeruli receiving inputs  
134 from TAAR3- and TAAR4-expressing neurons in previous reports (Dewan et al., 2018, 2013;  
135 Pacifico et al., 2012; Zhang et al., 2013).

136 To confirm that the glomeruli pairs represent medial and lateral maps, we retrogradely  
137 labeled TAAR3-expressing OSN axons by implanting the IPA-responsive glomeruli in OMP-  
138 GCaMP3 mice with DiI (1,1'-dioctadecyl-3,3,3'-tetramethylindocarbocyanine perchlorate)  
139 crystals. Optical observation performed 8 h later revealed labeling of OSN axons in both lateral  
140 and medial glomeruli (Fig. 2A5). These labeled axons were observed more clearly in fixed tissue  
141 2 days later (Fig. 2B). Dorsolateral to the lateral IPA-responsive glomerulus, the majority of the  
142 labeled axons were oriented in an anterolateral direction (orange dashed ellipses in Fig. 2B and  
143 C). By contrast, the majority of axons dorsomedial to the medial IPA-responsive glomerulus  
144 were in an anteromedial direction (toward the septum) (yellow dotted ellipses in Fig. 2B and D).  
145 Notably, multiple glomerular structures were revealed by the terminal branches of labeled axons  
146 in the medial region (red asterisks in Fig. 2E), indicating that these axons originated from the  
147 medial side. Taken together, these results indicate that the pairs of recorded glomeruli were  
148 homologous pairs representing both lateral and medial maps. Therefore, our experimental design  
149 provides a unique opportunity to record simultaneously the odor-evoked neuronal activity of  
150 homologous glomeruli in the medial and lateral maps in OBs.

151

152 **Similar temporal odor representations between medial and lateral maps in the OB.**



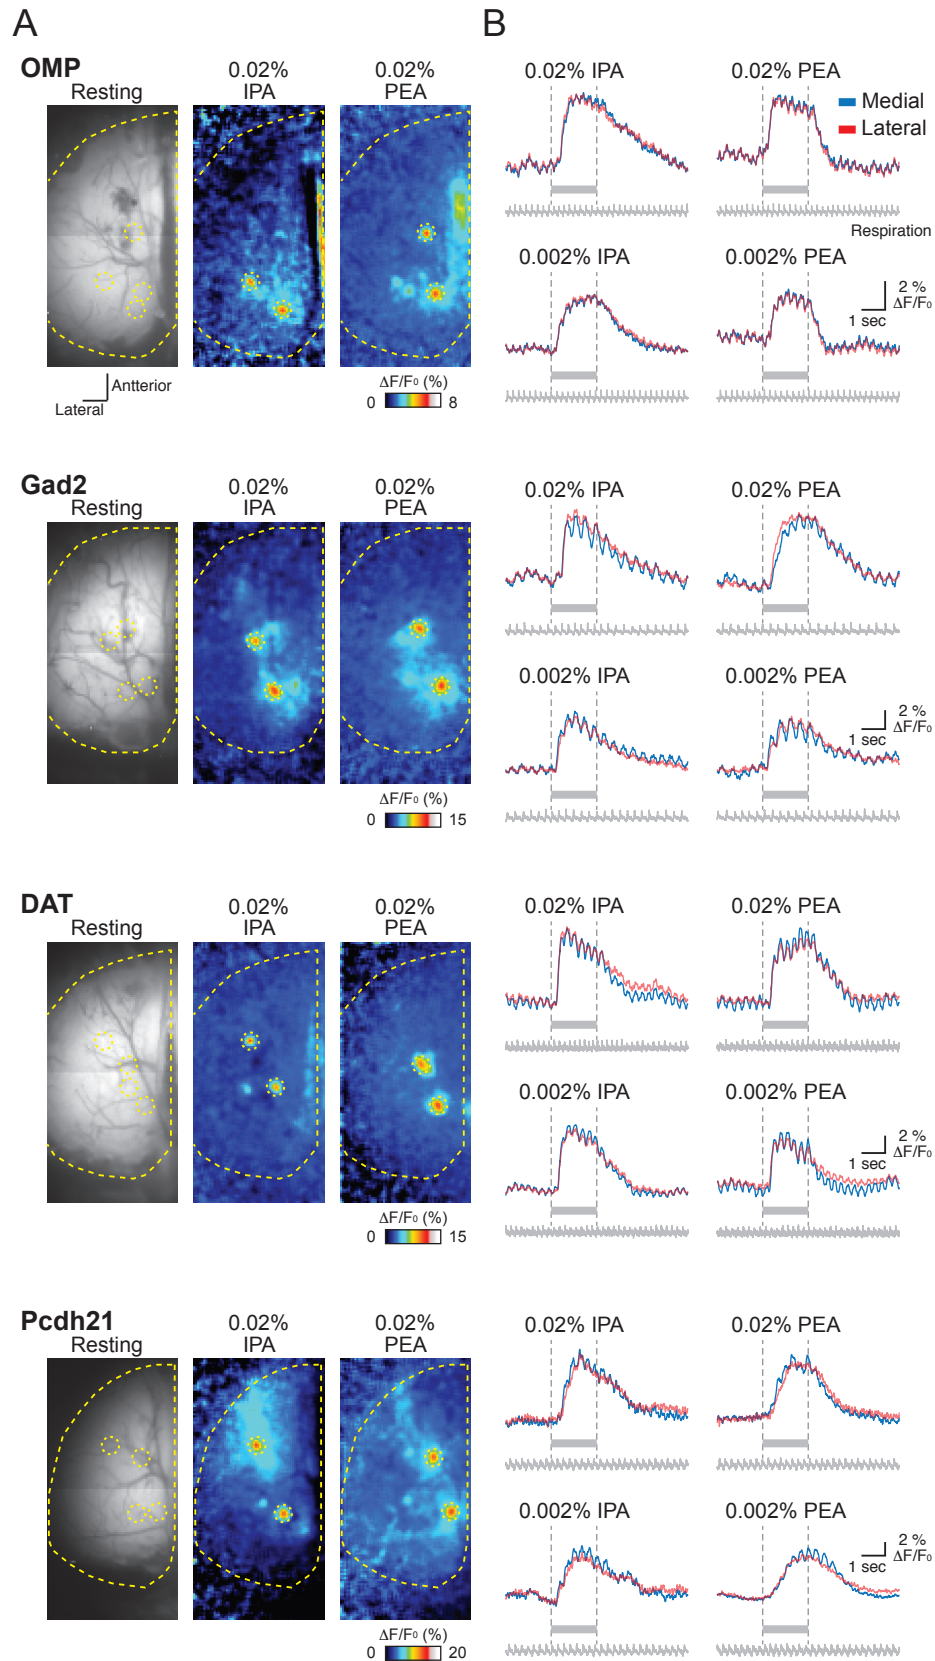

Figure 3: Odor-evoked response maps and traces among different types of OB neurons.

Odor-evoked response maps (A) and traces (B) from OMP-Cre, Gad2-Cre, DAT-Cre, and Pcdh21-Cre mice. Resting GCaMP3 fluorescence images are displayed in the left panels in A. Pseudocolored images in the middle and right panels in A indicate responses to 0.02% IPA and PEA, respectively. Yellow dotted lines and circles in each image show approximately the edge of the left OB and homologous glomeruli evoked by 0.02% IPA and PEA, respectively. The color scales represent  $\Delta F/F_0$  (%) of GCaMP3 signal. Traces shown in B represent GCaMP3 fluorescence changes from two subsets of homologous glomeruli evoked by indicated concentrations of IPA and PEA shown in A. Red and blue traces indicate lateral and medial glomeruli, respectively. Gray bars under each trace and vertical dotted lines indicate the timing of odor stimulation. Respiration signals are also shown under the traces.

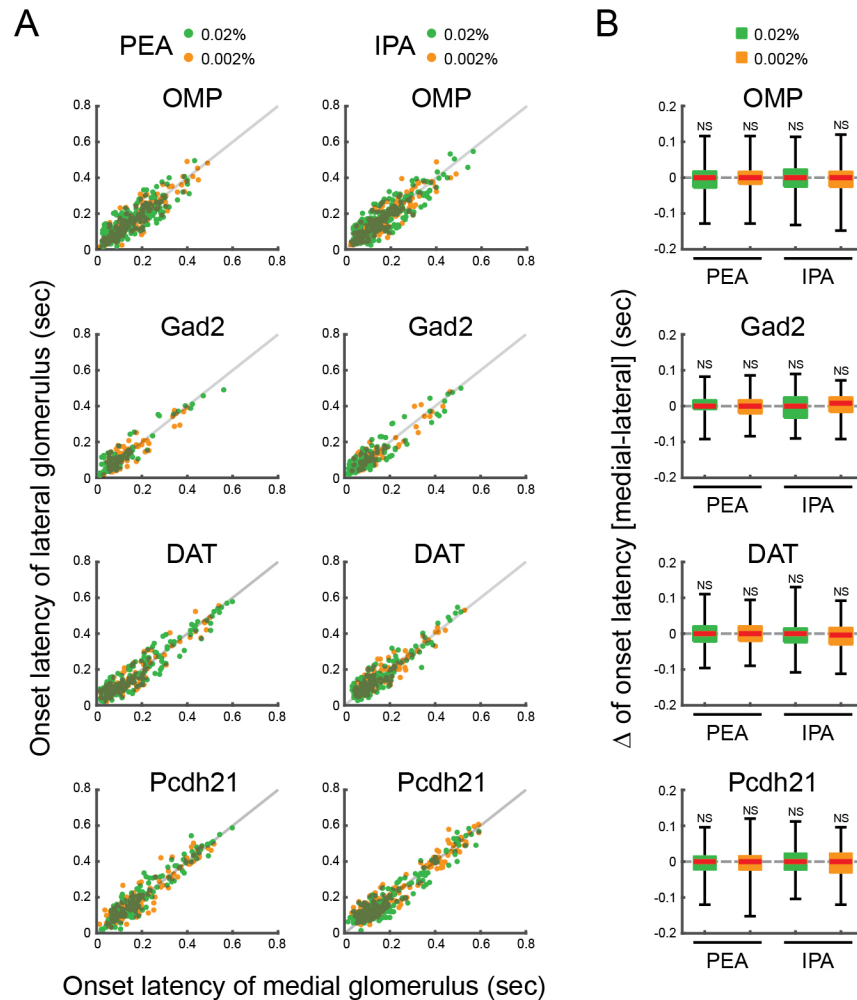

Figure 4: Onset latencies of medial and lateral glomeruli. (A) Scatter plots displaying the distributions of onset latencies of medial and lateral glomeruli, which responded to PEA and IPA stimuli. x and y axes indicate onset latencies of medial and lateral glomerular responses, respectively. Individual green and orange dots indicate single trial data of 0.02% and 0.002% PEA or IPA. Gray lines indicate the equal onset latency time points of medial and lateral glomerular responses. (B) Box plots displaying the distributions of the differences of onset latencies between medial and lateral glomeruli responses to 0.02% and 0.002% PEA or IPA. Red horizontal lines in each box indicate the medians. Quartiles are shown as whiskers. NS, not significant (two-tailed paired Student's t test).



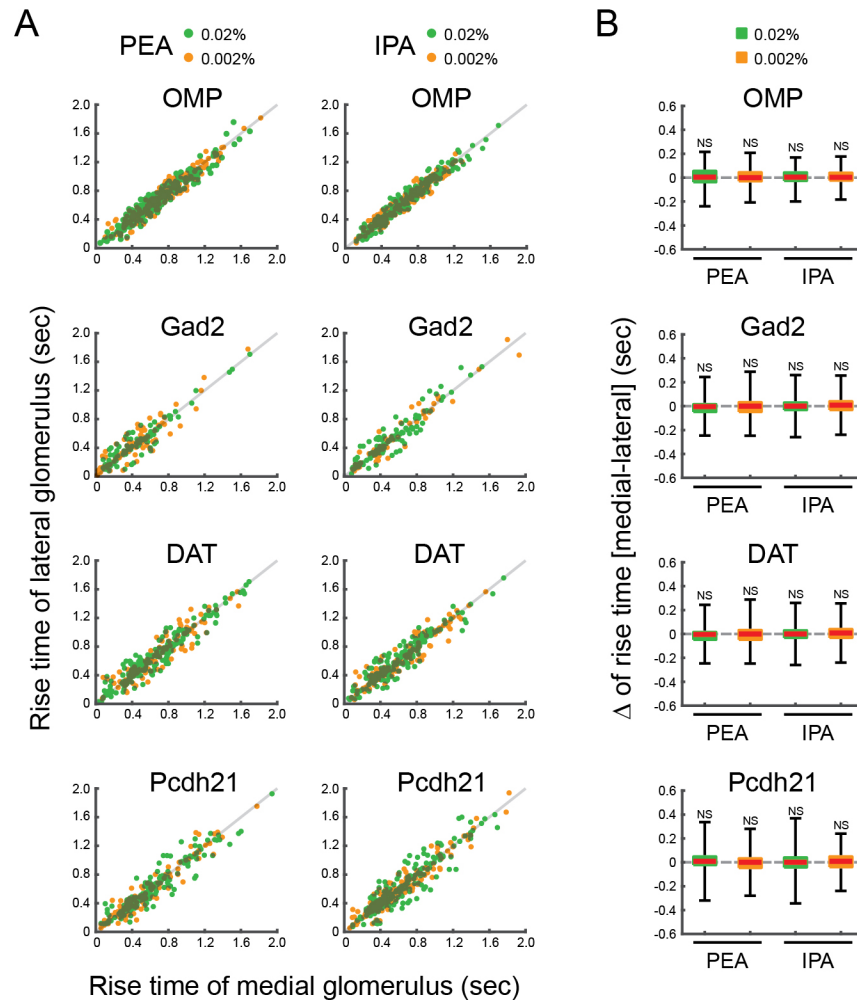

Figure 5: Rise times of medial and lateral glomeruli. (A) Scatter plots displaying the distributions of rise times of the medial and lateral glomeruli, which responded to PEA and IPA stimuli. x and y axes indicate rise times of medial and lateral glomerular responses, respectively. Individual green and orange dots indicate single trial data of 0.02% and 0.002% PEA or IPA. Gray lines indicate the equal rise time points of medial and lateral glomerular responses. (B) Box plots displaying the distributions of the differences of rise times between medial and lateral glomerular responses to 0.02% and 0.002% PEA or IPA. Red horizontal lines in each box indicate the medians. Quartiles are shown as whiskers. NS, not significant (two-tailed paired Student's t test).

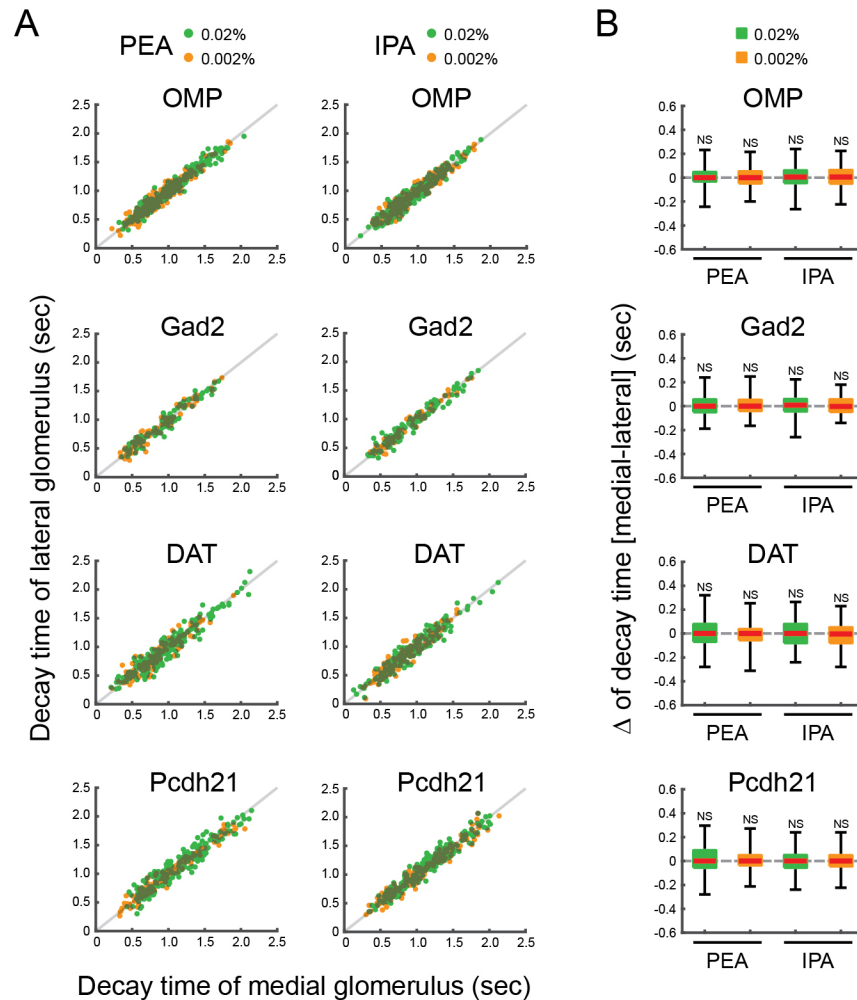

Figure 6: Decay times of medial and lateral glomeruli.

(A) Scatter plots displaying the distributions of decay times of the medial and lateral glomeruli, which responded to PEA and IPA stimuli. x and y axes indicate decay times of medial and lateral glomerular responses, respectively. Individual green and orange dots indicate single trial data of 0.02% and 0.002% PEA or IPA. Gray lines indicate the equal decay time points of medial and lateral glomerular responses. (B) Box plots displaying the distributions of the differences of decay times between medial and lateral glomerular responses to 0.02% and 0.002% PEA or IPA. Red horizontal lines in each box indicate the medians. Quartiles are shown as whiskers. NS, not significant (two-tailed paired Student's t test).

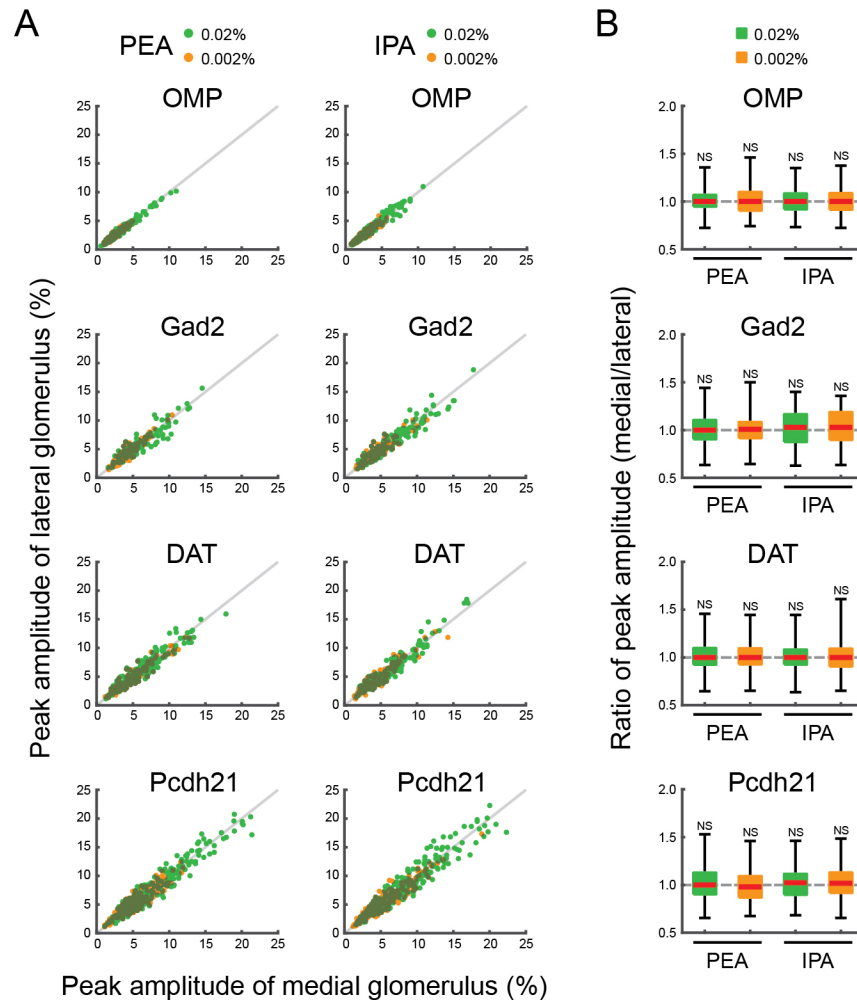

Figure 7: Peak amplitude of medial and lateral glomerular responses. (A) Scatter plots displaying the distributions of peak amplitudes of medial and lateral glomerular responses to PEA and IPA stimuli. x and y axes indicate peak amplitudes of medial and lateral glomerular responses, respectively. Individual green and orange dots indicate single trial data of 0.02% and 0.002% PEA or IPA. Gray lines indicate the equal peak amplitudes of medial and lateral glomerular responses. (B) Box plots displaying the distributions of the differences of peak amplitudes of medial and lateral glomerular responses to 0.02% and 0.002% PEA or IPA. Red horizontal lines in each box indicate the medians. Quartiles are shown as whiskers. NS, not significant (two-tailed paired Student's t test).

153 The medial and lateral glomeruli pairs represent inputs from odorant receptors of the same type  
154 within medial and lateral regions, respectively, of the complex OE structure. Receptors in these  
155 regions may be exposed to different air flow rates and mucosal volumes. We hypothesized that  
156 these differences would be reflected in the timing of the glomeruli responses. However, the  
157 calcium signals from all cell types examined in medial and lateral glomeruli in response to IPA  
158 and PEA had similar amplitudes and temporal patterns (Fig. 3B). Further analyses revealed that  
159 the timing of odor inputs to both maps was similar, as revealed by the onset latency measured as  
160 the time at which the calcium signal exceeded the threshold from first inhalation during odor  
161 stimulation (Fig. 4). The rise times of the responses, which are an indicator of response speed  
162 and reflect the neuronal spike frequency, were similar between medial and lateral glomeruli (Fig.  
163 5). The rise time was assessed as the duration for the calcium signal to increase from 20% to  
164 80% of the peak signal. Conversely, the similar decay times, during which the calcium signal  
165 decreased from 100% to 50% of the peak signals, suggested that the activity in one glomerulus  
166 was not prolonged relative to the other after the odor stimulus was turned off (Fig. 6). Both  
167 glomeruli in the pairs had responses that were similar in strength, as indicated by the peak  
168 amplitudes (Fig. 7). Overall, there were no significant differences between paired glomeruli in  
169 onset latency, rise time, decay time, and peak amplitude of the calcium responses in any of the  
170 cell types studied (two-tailed paired  $t$  tests, see Table 1).

171

### 172 **Respiration-locked calcium fluctuations in medial maps are larger than in lateral maps.**

173 Oscillatory calcium responses associated with respiration were observed in the optical recordings  
174 (Fig. 3B). These respiratory-linked fluctuations in calcium signals in medial glomeruli appeared  
175 to be larger in the postsynaptic neurons (i.e., GABAergic, dopaminergic, and mitral/tufted cells

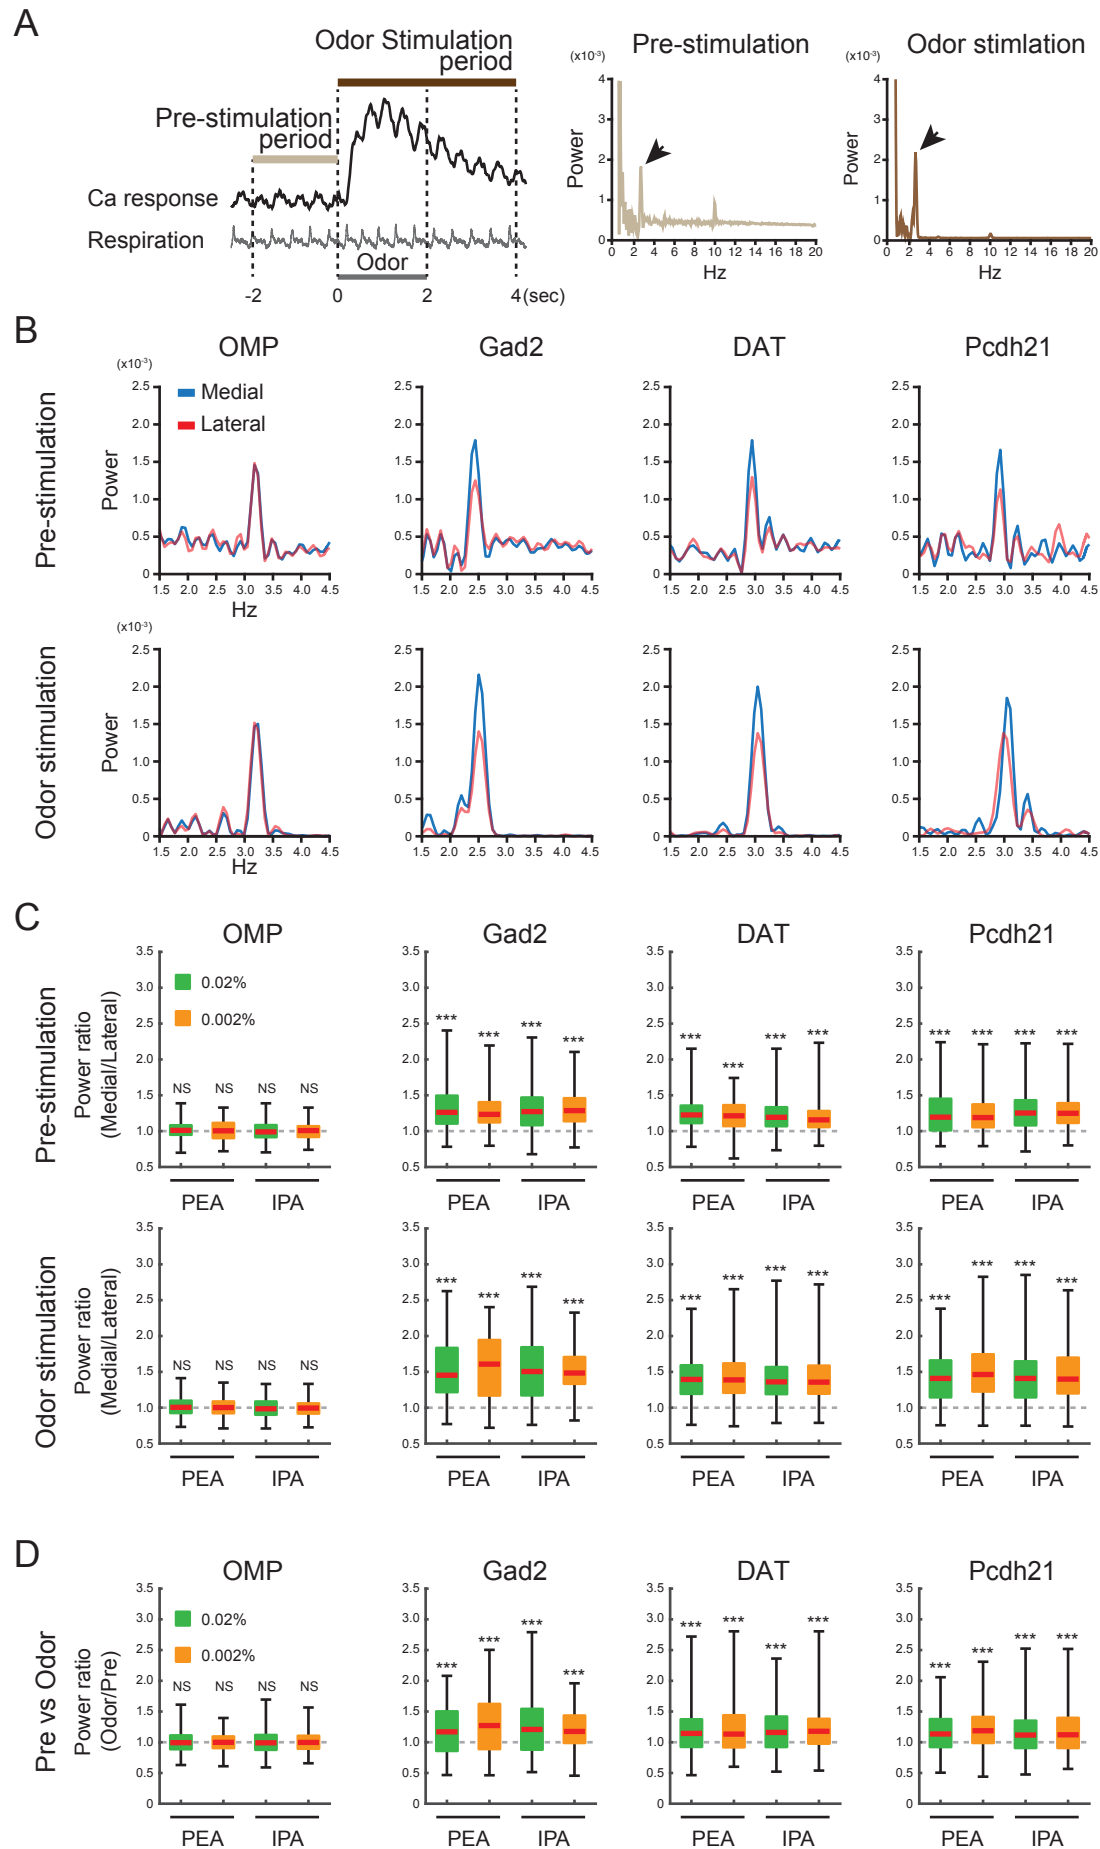

Figure 8: Respiration-locked calcium fluctuations of medial and lateral glomeruli.

(A) Schematic illustration of data collection time points and power spectral analysis. The prestimulation and odor stimulation periods are defined in left panel. Middle and right panels are representative examples of power spectral analyses with large frequency ranges in single trials. Respiration-locked fluctuations of calcium signals were prominently observed at 2–4 Hz (arrows). (B) Representative results of power spectral analyses of calcium signals during prestimulation (upper panels) and odor stimulation (lower panels) periods in neurons from GCaMP-expressing OMP-, Gad2-, DAT-, and Pcdh21-Cre mice. These calcium response traces are shown as 0.02% IPA response signals (as in Fig. 3B). Blue and red traces indicate medial and lateral glomeruli, respectively. (C) Comparisons of power spectra between the homologous glomeruli during the prestimulation (upper panels) and odor stimulation (lower panels) period in neurons from OMP-, Gad2-, DAT-, and Pcdh21-Cre mice. The ratios of peak powers were calculated by dividing the medial glomerular power by the lateral glomerular power in each trial. (D) Comparisons of peak power between the prestimulation and odor stimulation periods. The power ratios were calculated by dividing the odor stimulation period power (lower panels in C) by the prestimulation-period power (shown in C, upper panels). Red horizontal lines in each box show medians. Quartiles are shown as whiskers. NS, not significant; \*\*\*,  $p < 0.001$  two-tailed paired Student's *t* test).

176 in the Gad2-Cre, DAT-Cre, and Pcdh21-Cre lines, respectively) than in the OSNs (i.e., cells in  
177 the OMP-Cre line). To examine this quantitatively, we applied a power spectral analysis to the  
178 data. Power spectra before and during odor stimulation displayed peak frequencies of 2–4 Hz  
179 (arrows in Fig. 8A), which matches the respiration rhythm under our experimental conditions.  
180 These respiration-locked calcium oscillations were detected in all the cell types (Fig. 8B). The  
181 peak power spectra at 2–4 Hz were indeed larger in medial glomeruli than in lateral glomeruli  
182 from Gad2-, DAT-, and Pcdh21-Cre mice both before and after odor stimulation but not in  
183 OMP-Cre mice. The statistical analysis is summarized in Fig. 8C (two-tailed paired *t* tests, see  
184 Table 1; the datasets are the same as in Fig. 4–7). In addition, the medial/lateral power ratios for  
185 spectra from postsynaptic neurons were larger during odor stimulation than before stimulation  
186 (Fig. 8D), suggesting a strong influence of the odor stimulus on the size of the fluctuation. These  
187 differences were observed consistently with 0.02% and 0.002% PEA and IPA (two-tailed paired  
188 *t* tests, see Table 1). These results suggest that respiration-locked calcium fluctuations in the  
189 medial maps are enhanced postsynaptically in the OB by odorant stimulation.

| Figure | Mice   | Odorant | Conc.  | p value | Figure  | Mice   | Odorant | Conc.  | p value   |
|--------|--------|---------|--------|---------|---------|--------|---------|--------|-----------|
| 4B     | OMP    | PEA     | 0.02%  | 0.1296  | 7B      | DAT    | PEA     | 0.02%  | 0.6461    |
| 4B     | OMP    | PEA     | 0.002% | 0.8526  | 7B      | DAT    | PEA     | 0.002% | 0.4716    |
| 4B     | OMP    | IPA     | 0.02%  | 0.1721  | 7B      | DAT    | IPA     | 0.02%  | 0.6236    |
| 4B     | OMP    | IPA     | 0.002% | 0.3464  | 7B      | DAT    | IPA     | 0.002% | 0.6799    |
| 4B     | Gad2   | PEA     | 0.02%  | 0.1014  | 7B      | Pcdh21 | PEA     | 0.02%  | 0.6480    |
| 4B     | Gad2   | PEA     | 0.002% | 0.5423  | 7B      | Pcdh21 | PEA     | 0.002% | 0.2161    |
| 4B     | Gad2   | IPA     | 0.02%  | 0.8620  | 7B      | Pcdh21 | IPA     | 0.02%  | 0.6518    |
| 4B     | Gad2   | IPA     | 0.002% | 0.5818  | 7B      | Pcdh21 | IPA     | 0.002% | 0.1591    |
| 4B     | DAT    | PEA     | 0.02%  | 0.9053  |         |        |         |        |           |
| 4B     | DAT    | PEA     | 0.002% | 0.9828  | 8C Pre  | OMP    | PEA     | 0.02%  | 0.2291    |
| 4B     | DAT    | IPA     | 0.02%  | 0.1108  | 8C Pre  | OMP    | PEA     | 0.002% | 0.7955    |
| 4B     | DAT    | IPA     | 0.002% | 0.0804  | 8C Pre  | OMP    | IPA     | 0.02%  | 0.4799    |
| 4B     | Pcdh21 | PEA     | 0.02%  | 0.4278  | 8C Pre  | OMP    | IPA     | 0.002% | 0.5202    |
| 4B     | Pcdh21 | PEA     | 0.002% | 0.1816  | 8C Pre  | Gad2   | PEA     | 0.02%  | 1.337E-09 |
| 4B     | Pcdh21 | IPA     | 0.02%  | 0.6100  | 8C Pre  | Gad2   | PEA     | 0.002% | 2.453E-13 |
| 4B     | Pcdh21 | IPA     | 0.002% | 0.1658  | 8C Pre  | Gad2   | IPA     | 0.02%  | 8.218E-08 |
|        |        |         |        |         | 8C Pre  | Gad2   | IPA     | 0.002% | 4.121E-11 |
| 5B     | OMP    | PEA     | 0.02%  | 0.1331  | 8C Pre  | DAT    | PEA     | 0.02%  | 2.031E-29 |
| 5B     | OMP    | PEA     | 0.002% | 0.1783  | 8C Pre  | DAT    | PEA     | 0.002% | 1.344E-11 |
| 5B     | OMP    | IPA     | 0.02%  | 0.2068  | 8C Pre  | DAT    | IPA     | 0.02%  | 3.134E-24 |
| 5B     | OMP    | IPA     | 0.002% | 0.2453  | 8C Pre  | DAT    | IPA     | 0.002% | 2.399E-13 |
| 5B     | Gad2   | PEA     | 0.02%  | 0.0977  | 8C Pre  | Pcdh21 | PEA     | 0.02%  | 8.012E-09 |
| 5B     | Gad2   | PEA     | 0.002% | 0.9225  | 8C Pre  | Pcdh21 | PEA     | 0.002% | 6.231E-11 |
| 5B     | Gad2   | IPA     | 0.02%  | 0.2570  | 8C Pre  | Pcdh21 | IPA     | 0.02%  | 8.138E-18 |
| 5B     | Gad2   | IPA     | 0.002% | 0.5774  | 8C Pre  | Pcdh21 | IPA     | 0.002% | 1.721E-18 |
| 5B     | DAT    | PEA     | 0.02%  | 0.5551  |         |        |         |        |           |
| 5B     | DAT    | PEA     | 0.002% | 0.8928  | 8C Odor | OMP    | PEA     | 0.02%  | 0.8207    |
| 5B     | DAT    | IPA     | 0.02%  | 0.1158  | 8C Odor | OMP    | PEA     | 0.002% | 0.4752    |
| 5B     | DAT    | IPA     | 0.002% | 0.5407  | 8C Odor | OMP    | IPA     | 0.02%  | 0.1282    |
| 5B     | Pcdh21 | PEA     | 0.02%  | 0.1650  | 8C Odor | OMP    | IPA     | 0.002% | 0.1916    |
| 5B     | Pcdh21 | PEA     | 0.002% | 0.7446  | 8C Odor | Gad2   | PEA     | 0.02%  | 1.343E-09 |
| 5B     | Pcdh21 | IPA     | 0.02%  | 0.5037  | 8C Odor | Gad2   | PEA     | 0.002% | 7.850E-10 |
| 5B     | Pcdh21 | IPA     | 0.002% | 0.2666  | 8C Odor | Gad2   | IPA     | 0.02%  | 7.617E-16 |
|        |        |         |        |         | 8C Odor | Gad2   | IPA     | 0.002% | 1.781E-11 |
| 6B     | OMP    | PEA     | 0.02%  | 0.4187  | 8C Odor | DAT    | PEA     | 0.02%  | 9.577E-18 |
| 6B     | OMP    | PEA     | 0.002% | 0.5834  | 8C Odor | DAT    | PEA     | 0.002% | 1.405E-10 |
| 6B     | OMP    | IPA     | 0.02%  | 0.2886  | 8C Odor | DAT    | IPA     | 0.02%  | 1.279E-19 |
| 6B     | OMP    | IPA     | 0.002% | 0.5170  | 8C Odor | DAT    | IPA     | 0.002% | 2.311E-08 |
| 6B     | Gad2   | PEA     | 0.02%  | 0.7568  | 8C Odor | Pcdh21 | PEA     | 0.02%  | 1.734E-15 |
| 6B     | Gad2   | PEA     | 0.002% | 0.8668  | 8C Odor | Pcdh21 | PEA     | 0.002% | 2.535E-09 |
| 6B     | Gad2   | IPA     | 0.02%  | 0.2757  | 8C Odor | Pcdh21 | IPA     | 0.02%  | 4.144E-18 |
| 6B     | Gad2   | IPA     | 0.002% | 0.8687  | 8C Odor | Pcdh21 | IPA     | 0.002% | 1.778E-14 |
| 6B     | DAT    | PEA     | 0.02%  | 0.4066  |         |        |         |        |           |
| 6B     | DAT    | PEA     | 0.002% | 0.7572  | 8D      | OMP    | PEA     | 0.02%  | 0.7834    |
| 6B     | DAT    | IPA     | 0.02%  | 0.7893  | 8D      | OMP    | PEA     | 0.002% | 0.6397    |
| 6B     | DAT    | IPA     | 0.002% | 0.2148  | 8D      | OMP    | IPA     | 0.02%  | 0.5733    |
| 6B     | Pcdh21 | PEA     | 0.02%  | 0.6586  | 8D      | OMP    | IPA     | 0.002% | 0.5445    |
| 6B     | Pcdh21 | PEA     | 0.002% | 0.3455  | 8D      | Gad2   | PEA     | 0.02%  | 4.175E-05 |
| 6B     | Pcdh21 | IPA     | 0.02%  | 0.3366  | 8D      | Gad2   | PEA     | 0.002% | 1.267E-05 |
| 6B     | Pcdh21 | IPA     | 0.002% | 0.1663  | 8D      | Gad2   | IPA     | 0.02%  | 7.056E-07 |
|        |        |         |        |         | 8D      | Gad2   | IPA     | 0.002% | 6.139E-04 |
| 7B     | OMP    | PEA     | 0.02%  | 0.3851  | 8D      | DAT    | PEA     | 0.02%  | 2.906E-08 |
| 7B     | OMP    | PEA     | 0.002% | 0.8639  | 8D      | DAT    | PEA     | 0.002% | 9.435E-08 |
| 7B     | OMP    | IPA     | 0.02%  | 0.2743  | 8D      | DAT    | IPA     | 0.02%  | 5.601E-11 |
| 7B     | OMP    | IPA     | 0.002% | 0.7079  | 8D      | DAT    | IPA     | 0.002% | 1.080E-07 |
| 7B     | Gad2   | PEA     | 0.02%  | 0.6291  | 8D      | Pcdh21 | PEA     | 0.02%  | 1.570E-08 |
| 7B     | Gad2   | PEA     | 0.002% | 0.5314  | 8D      | Pcdh21 | PEA     | 0.002% | 7.645E-10 |
| 7B     | Gad2   | IPA     | 0.02%  | 0.0769  | 8D      | Pcdh21 | IPA     | 0.02%  | 2.666E-09 |
| 7B     | Gad2   | IPA     | 0.002% | 0.4791  | 8D      | Pcdh21 | IPA     | 0.002% | 2.909E-09 |



190 **Discussion**

191 **Pre/postsynaptic calcium events in multiple cell types.**

192 In this work, GCaMP was expressed in postsynaptic GABAergic, dopaminergic, and  
193 mitral/tufted cells and in presynaptic axon terminals of OSNs of mice from various transgenic  
194 Cre-driver lines. Calcium signaling in OSNs reflects activation resulting in transmitter release,  
195 whereas calcium signaling in the other cell types may reflect activation of calcium-permeable  
196 glutamate receptors and the opening of calcium channels in response to excitatory postsynaptic  
197 potentials or spikes initiated in the dendrites or soma (Burnashev et al., 1992; Chen et al., 1997;  
198 Halabisky et al., 2000; Helmchen et al., 1999; Nagayama et al., 2007; Svoboda et al., 1999).  
199 Therefore, the calcium influxes in these cells are controlled by different biophysical mechanisms  
200 and represent different aspects of biological events. These differences would not impact our  
201 imaging results, as the comparisons were between medial and lateral glomeruli comprising the  
202 same cell types. Notably, we did not observe cell-type-specific differences between the medial  
203 and lateral maps at the glomerular level, which is consistent with recent data at the single-cell  
204 level showing that odorant responses of juxtglomerular cells are associated with the same  
205 glomerulus putatively (Homma et al., 2019). Nevertheless, we cannot exclude the possibility of  
206 differential response timing by different cell types, because the time resolution for calcium  
207 imaging was limited and did not reflect that activity of all neurons within a glomerulus. Future  
208 studies may begin to address this by imaging spike activity at a single-cell resolution.

209

210 **Response timing of the homologous glomeruli in medial and lateral maps.**

211 A pioneer electrophysiological study using a unique transgenic mouse line in which all OSNs  
212 express the same odorant receptor suggested that that the latencies of mitral cell responses to

213 odorant stimulation are shorter in the medial map than in the lateral map, especially at a low  
214 odorant concentration (Zhou and Belluscio, 2012). Because the OE is a complicated structure,  
215 airflow speed likely varies throughout the nasal cavity, and odorants may reach different areas at  
216 different times (Kimbell et al., 1997; Schoenfeld and Cleland, 2006; Zhao et al., 2006). This  
217 would produce a time lag for odorant responses in medial and lateral neurons. However, we did  
218 not observe different onset latencies between homologous medial and lateral glomeruli, even at  
219 low odorant concentrations. This may be because our recordings were via optical imaging rather  
220 than electrophysiology and from glomerular rather than MCLs. Another possible reason is the  
221 difference in OB regions recorded, which reflect inputs from different OE regions. Our study  
222 was restricted to a small region of the posteromedial dorsal OB, which receives inputs from the  
223 dorsal OE (Miyamichi et al., 2005). The dorsal OE faces the large nasal cavity and has a  
224 relatively simple wall structure compared with that of ventral zones. Moreover, OSNs projecting  
225 to medial and lateral maps are close together in the dorsal OE, for which any latency would not  
226 be detectable under our experimental conditions. It is possible that differential latencies from  
227 neurons in the ventral OB may be larger or more easily detected (Kimbell et al., 1997;  
228 Schoenfeld and Cleland, 2006; Zhao et al., 2006). In other words, the time lag may gradually  
229 become larger along the dorsal-ventral axis in the OB.

230

### 231 **Neuronal/circuitry mechanism of respiration-locked calcium fluctuations**

232 The fluctuations of calcium responses, which corresponded to the rhythm of respiration, were  
233 larger in medial glomeruli than in lateral glomeruli. This may reflect differential airflow volumes  
234 or rates along the medial and lateral sides of the nostril. As this was only observed in  
235 postsynaptic calcium responses, the modulation is likely not within the OE but in the OB. The

236 mechanism for this modulation may involve the physiological properties of these and/or  
237 associated neurons in medial and lateral glomeruli, such as differences in the expression of  
238 various calcium and/or other essential channels. As we did not observe differences in the  
239 amplitudes of the calcium responses, more than one channel type may be involved. Differential  
240 expression of other essential molecules would also change neuronal and/or network excitability.  
241 Neurons in medial glomeruli may also increase and decrease their intracellular calcium levels  
242 more synchronously during inhalation and exhalation, respectively. Such synchrony would be  
243 expected to affect the overall activity of neurons within a glomerulus; this could more directly be  
244 addressed by studies recording neuronal spikes in the context of a circuit. Thus, further  
245 investigations are needed to determine the mechanism by which calcium fluctuations are larger  
246 in medial glomeruli than in lateral glomeruli in response to odorant stimulation.

247

#### 248 **Inhibitory connections between the two maps**

249 Tufted cells in the lateral glomeruli project to cells in the internal plexiform and superficial  
250 GCLs underlying the medial glomeruli receiving inputs from the same odorant receptors, and  
251 vice versa. These projections activate granule cells and thus inhibit surrounding mitral/tufted  
252 cells (Belluscio and Katz, 2001; Lodovichi et al., 2003; Zhou and Belluscio, 2008), resulting in  
253 mutual inhibition between the medial and lateral maps. Our data suggest this inhibition is not  
254 simple (i.e., one glomerulus is inhibited when the other is activated), as medial and lateral  
255 glomeruli are activated simultaneously during odor stimulation. The similar temporal patterns  
256 and the absence of counterphase-locked activity between the two glomeruli also suggest that the  
257 activity of one glomerulus does not inhibit the other homologous glomerulus in a given time  
258 phase, such as during inhalation or exhalation. The functional role of these mutual inhibitory

259 connections and how they contribute to odor processing remain unknown. It is possible that these  
260 connections regulate the temporal activity pattern and/or synchrony of neurons or glomeruli in  
261 both maps.

262

### 263 **Odor information processing streams from the medial and lateral maps**

264 One of the unresolved issues is where the medial and lateral maps project and how higher brain  
265 centers handle these two outputs. Current knowledge of the connections between the OB and the  
266 olfactory cortex (Ghosh et al., 2011; Igarashi et al., 2012; Miyamichi et al., 2011; Nagayama et  
267 al., 2010; Sosulski et al., 2011) suggest that there may not be dramatic differences regarding  
268 where the maps project. However, it is still not known whether the outputs from the two maps  
269 are evenly transmitted to all olfactory cortical areas, and some regions may preferentially receive  
270 input from one or the other. More detailed knowledge of the cortical projections may help reveal  
271 the significance of the multiple maps and how the information from the two information streams  
272 is compiled in higher brain centers.

273

### 274 **Rhythm of respiration**

275 In vertebrate land animals, airflow through the nasal cavity during respiration alternates between  
276 orthonasal and retronasal directions. This induces a synchronized rhythm in the olfactory system,  
277 which contributes to the odor information process (Cury and Uchida, 2010; Spors and Grinvald,  
278 2002; Uchida et al., 2014; Wilson and Mainen, 2006). Moreover, the orthonasal and retronasal  
279 airflows switch the perception from smells originating from the surrounding environment to taste  
280 in the mouth, respectively (Gautam and Verhagen, 2012; Shepherd, 2012). In addition to  
281 olfactory areas, respiration-locked oscillations have been observed in hippocampus as well as

282 barrel and prefrontal cortices in the rodent (Biskamp et al., 2017; Lockmann et al., 2016; Nguyen  
283 Chi et al., 2016; Phillips et al., 2012; Shusterman et al., 2011; Yanovsky et al., 2014). In the  
284 barrel cortex, phase-locked oscillation patterns coordinate the interaction between olfaction and  
285 tactile sensations (Ito et al., 2014), whereas freezing behavior is modulated by rhythmic activity  
286 in prelimbic prefrontal cortex driven by inputs from the anterior olfactory nucleus (Moberly et al.,  
287 2018), which has topographical connections to the OB (Schoenfeld et al., 1985; Yan et al., 2008).  
288 The anterior olfactory nucleus sub-region which dominantly primarily receive inputs from the  
289 medial map may relay this information to higher brain centers controlling respiration-linked  
290 neuronal activity associated with mouse behavior. Thus, the anterior olfactory nucleus may be  
291 responsible for processing information from multiple glomerular maps and represents an area  
292 that warrants further study.

293 **Materials and Methods**

294 All procedures were performed on mice of either sex in accordance with National Institutes of  
295 Health guidelines and approved by the Animal Welfare Committee at the University of Texas  
296 Health Science Center at Houston.

297

298 **Animals.**

299 Cre-inducible GCaMP3-expressing mice (Ai38; #014538, Jackson Laboratory, Bar Harbor, ME)  
300 (Zariwala et al., 2012) were used for the expression of the calcium indicator in target neurons.  
301 This mouse line was crossed with the following Cre-driver mouse lines: OMP-Cre (for OSNs,  
302 #006668; Jackson Laboratory) (Li et al., 2004), Gad2-Cre (for GABAergic neurons, #010802;  
303 Jackson Laboratory) (Taniguchi et al., 2011), DAT-Cre (for dopaminergic neurons, #006660;  
304 Jackson Laboratory) (Bäckman et al., 2006), and Pcdh21-Cre (for mitral/tufted cells, #02189;  
305 RIKEN BioResource Research Center, Tsukuba, Japan) (Nagai et al., 2005).

306

307 **Histology.**

308 Mice were deeply anesthetized and fixed by transcardial perfusion with 4% paraformaldehyde  
309 (PFA) in 0.1 M phosphate buffer (PB; pH 7.4). Then, whole brains were dissected out and  
310 postfixed in 4% PFA/0.1 M PB overnight. The samples were cryoprotected in 30% sucrose  
311 (wt/vol) in phosphate-buffered saline (PBS; pH 7.4) and embedded in optimal cutting  
312 temperature compound (Fisher HealthCare, Waltham, MA). Olfactory tissue sections 30- $\mu$ m  
313 thick were cut on a cryostat, washed with PBS, and mounted with Fluoroshield mounting  
314 medium (F6057; Sigma-Aldrich, St. Louis, MO). Images were captured on an Olympus  
315 FluoView FV1000 laser scanning confocal microscope using a 20 $\times$ /0.75 NA lens objective

316 (UPLSAPO 20X; Olympus, Tokyo, Japan).

317

318 **Odorant stimulation.**

319 IPA (#126810; Sigma-Aldrich) and PEA (#128945; Sigma-Aldrich) were diluted in mineral oil  
320 (M3516; Sigma-Aldrich) to 0.1% and 0.01% in glass vials. The odorants were vaporized using  
321 nitrogen, mixed with filtered air to final concentrations of 0.02% and 0.002% with 0.5 liter/min  
322 air flow rate, and then delivered to mouse nostrils using a custom-made olfactometer (Kikuta et  
323 al., 2013). The odorants were presented for 2 s with an interstimulus interval of >60 s to avoid  
324 sensory adaptation.

325

326 ***In vivo* optical imaging.**

327 GCaMP-expressing mice were anesthetized with urethane (1.2 g/kg of body weight,  
328 intraperitoneal). The depth of anesthesia was monitored by toe pinches throughout the  
329 experiment. Body temperature was kept between 36.0°C and 37.0°C with a heating pad. The  
330 skull over the OBs was carefully thinned with a dental drill and covered with 1.2% agarose  
331 dissolved in saline and with a 4–6-mm<sup>2</sup> coverslip (thickness, #1). Odor-evoked GCaMP3 signals  
332 were recorded through a 5× lens objective (Fluar 5×/0.25; Zeiss, Oberkochen, Germany) on a  
333 microscope (SliceScope; Scientifica, Uckfield, United Kingdom) equipped with a high-speed  
334 charge-coupled-device camera (NeuroCCD-SM256; RedShirtImaging, Decatur, GA) at 125 Hz  
335 (128 × 128 pixels) for 12 s, which included a 4-s prestimulus period and a 2-s odor presentation  
336 period. Excitation light was provided using a 470-nm light-emitting diode module (M470L2;  
337 Thorlabs, Newton, NJ). A standard green fluorescent protein filter set (BrightLine GFP-4050A-  
338 OMF-ZERO; Semrock, Rochester, NY) was used to detect the GCaMP3 signal. Chest movement

339 of the animals was monitored to measure the respiratory rhythm during the optical imaging  
340 period.

341

#### 342 **DiI labeling of OSN axons.**

343 After calcium imaging, the skull over the dorsal OBs was removed. Then, small DiI crystals  
344 were attached to the tip of glass capillaries (tip diameter,  $\sim 5 \mu\text{m}$ ) and embedded into the area of  
345 IPA-responsive glomeruli. The positions of blood vessels relative to identical pairs of glomeruli  
346 were used as landmarks for DiI implantation. The mice remained anesthetized for 9–10 h after  
347 DiI implantation and then were fixed by transcardial perfusion with 4% PFA/0.1 M PB. Whole  
348 brains were removed and incubated in PBS at room temperature until observation. Low-  
349 magnification images were captured by a charge-coupled-device camera (NeuroCCD-SM256 or  
350 SensiCam; PCO, Kelheim, Germany) using a  $5\times$  lens objective (Fluar  $5\times/0.25$ , Zeiss) with a  
351 light-emitting diode module (MCWHL2-C1; Thorlabs) and a standard Cy3 cube (BrightLine  
352 Cy3-4040C-OMF-ZERO; Semrock). For high-magnification views of OSN axons, images were  
353 acquired with a two-photon microscope (Prairie Ultima; Bruker, Billerica, MA), using a  $20\times$   
354 water immersion lens objective (UMPLFLH 20XW; Olympus), with a  $5\text{-}\mu\text{m}$  inter-z-slice interval  
355 and  $512 \times 512$  pixel resolution. DiI was excited at 920 nm (Ti:sapphire laser, MaiTai HP DS;  
356 Spectra-Physics, Santa Clara, CA), and DiI fluorescence was detected with an emission filter  
357 cube (575-nm dichroic mirror and 607/45-nm barrier filters).

358

#### 359 **Data analysis for wide-field calcium imaging data.**

360 Odor-evoked response maps were generated using Fiji/ImageJ (Schindelin et al., 2012) with  
361 custom-written scripts. Spatially filtered ( $3 \times 3$  mean filter) prestimulation-period images (4 s)



362 were averaged and used as a baseline ( $F_0$ ). Images averaged 3 s after the onset of the 1-s odor  
363 stimulation were used as the response image ( $F$ ). Then,  $F$  was subtracted from  $F_0$  to obtain the  
364 difference ( $\Delta F$ ).  $\Delta F$  values were divided by  $F_0$  to obtain the ratio image ( $\Delta F/F_0$ ). Spatial filters (3  
365  $\times$  3 mean filter) were also applied to the ratio images. All negative values were set to zero in the  
366 images. Regions of interest corresponding to glomeruli were manually set (4–8 pixels centered  
367 on each glomeruli).

368 The time courses of calcium signals (see Fig. 3B) were calculated using MATLAB  
369 (MathWorks, Natick, MA) with custom-written scripts.  $\Delta F/F_0$  values were calculated using the  
370 same procedure described above but with a temporal filter (3 frames average, 24 ms) rather than  
371 a spatial filter applied to the  $\Delta F/F_0$  values.

372 Onset latency, rise time, decay time, and peak amplitude were computed with custom  
373 MATLAB scripts. First, the baseline values ( $\Delta F/F_0$ ) were determined as the mean values over the  
374 baseline period, which were defined as the 80-ms time window immediately before stimulation  
375 onset. Then, the noise level in each trial was defined as the minimum standard deviation among  
376 eight 0.5-s blocks in the 4-s prestimulation period. The onset latency was determined as the first  
377 time point at which all data points in the subsequent 80 ms exceeded the threshold (2.5 times the  
378 noise level). The onset latency was measured as the time elapsed from the first inhalation after  
379 the onset of odor presentation. The rise time was defined as the duration the calcium signals  
380 increased from 20% to 80% of peak amplitude. Time points for when the calcium signals  
381 reached 20% and 80% of the peak amplitude were set as the earliest time point after which half  
382 of the data points in the subsequent 80 ms exceeded these criteria. The decay time was defined as  
383 the duration the calcium signal decreased from 100% to 50% of the peak amplitude. Time points  
384 for when the calcium signals reached 100% and 50% of peak amplitude were set as the earliest

385 time point after which half of data points in the subsequent 80 ms dropped below these criteria.

386 The peak amplitude was measured as the maximum value using the 80-ms time window moving  
387 average, which reflects average of 9 sequential data points, after stimulation onset.

388 To analyze fluctuations in the calcium fluorescence, a power spectral analysis based on  
389 Fourier transform was used. First,  $\Delta F/F_0$  values were preprocessed with a 40-ms box filter and  
390 divided into two periods, corresponding to prestimulation (2 s before onset of odor stimulation)  
391 and odor stimulation (4 s after onset of odor stimulation). Then, a power spectrum was computed  
392 by using Fast Fourier transform with 2,048 points (using a built-in function of MATLAB [fft.m])  
393 in each period. Because we used a 125-Hz sampling frequency, the frequency resolution is 0.061  
394 Hz. The peak power in each period was determined as the maximum value between 2 and 4 Hz.

395

#### 396 **Statistics.**

397 Statistical analyses were performed using Microsoft Excel 2013. All statistical significance was  
398 determined by a two-tailed paired Student's *t* test; *p* values of <0.05 were considered statistically  
399 significant. Data are presented as scatter and box-whisker plots of pooled data sets for a given  
400 odorant and concentration from OMP- (279 trials in 0.02% PEA, 194 trials in 0.002% PEA, 297  
401 trials in 0.02% IPA, and 185 trials in 0.002% IPA; *n* = 10), Gad2- (106 trials in 0.02% PEA, 84  
402 trials in 0.002% PEA, 119 trials in 0.02% IPA, and 62 trials in 0.002% IPA; *n* = 6), DAT- (216  
403 trials in 0.02% PEA, 118 trials in 0.002% PEA, 184 trials in 0.02% IPA, and 123 trials in  
404 0.002% IPA; *n* = 6), and Pcdh21-Cre (199 trials in 0.02% PEA, 130 trials in 0.002% PEA, 241  
405 trials in 0.02% IPA, and 176 trials in 0.002% IPA; *n* = 6) mice. In scatter plots, individual dots  
406 show data points from single trials. In box-whisker plots, horizontal red lines and boxes indicate  
407 the medians and quartiles, respectively. The whiskers go from each quartile to the minimum or

408 maximum. All  $p$  values calculated in this study are listed in Table 1.

409

410 **Acknowledgements**

411 We thank Dr. Dewan for discussions of odorant response properties and the location of TAAR

412 glomeruli.

413

414 **Competing interests**

415 None.

416 **References**

- 417 Bäckman CM, Malik N, Zhang Y, Shan L, Grinberg A, Hoffer BJ, Westphal H, Tomac AC.  
418 2006. Characterization of a mouse strain expressing Cre recombinase from the 3'  
419 untranslated region of the dopamine transporter locus. *genesis* **44**:383–390.  
420 doi:10.1002/dvg.20228
- 421 Belluscio L, Katz LC. 2001. Symmetry, stereotypy, and topography of odorant representations in  
422 mouse olfactory bulbs. *J Neurosci* **21**:2113–22.
- 423 Belluscio L, Lodovichi C, Feinstein P, Mombaerts P, Katz LC. 2002. Odorant receptors instruct  
424 functional circuitry in the mouse olfactory bulb. *Nature* **419**:296–300.  
425 doi:10.1038/nature01001
- 426 Biskamp J, Bartos M, Sauer J-F. 2017. Organization of prefrontal network activity by  
427 respiration-related oscillations. *Sci Rep* **7**:45508. doi:10.1038/srep45508
- 428 Buck LB. 1996. Information Coding in the Vertebrate Olfactory System. *Annu Rev Neurosci*  
429 **19**:517–544. doi:10.1146/annurev.ne.19.030196.002505
- 430 Burnashev N, Khodorova A, Jonas P, Helm PJ, Wisden W, Monyer H, Seeburg PH, Sakmann B.  
431 1992. Calcium-permeable AMPA-kainate receptors in fusiform cerebellar glial cells.  
432 *Science* **256**:1566–70.
- 433 Chen WR, Midtgaard J, Shepherd GM. 1997. Forward and backward propagation of dendritic  
434 impulses and their synaptic control in mitral cells. *Science* **278**:463–7.
- 435 Cury KM, Uchida N. 2010. Robust odor coding via inhalation-coupled transient activity in the  
436 mammalian olfactory bulb. *Neuron* **68**:570–85. doi:10.1016/j.neuron.2010.09.040
- 437 Dewan A, Cichy A, Zhang J, Miguel K, Feinstein P, Rinberg D, Bozza T. 2018. Single olfactory  
438 receptors set odor detection thresholds. *Nat Commun* **9**:2887. doi:10.1038/s41467-018-

- 439 05129-0
- 440 Dewan A, Pacifico R, Zhan R, Rinberg D, Bozza T. 2013. Non-redundant coding of aversive  
441 odours in the main olfactory pathway. *Nature* **497**:486–489. doi:10.1038/nature12114
- 442 Ferrero DM, Lemon JK, Fluegge D, Pashkovski SL, Korzan WJ, Datta SR, Spehr M, Fendt M,  
443 Liberles SD. 2011. Detection and avoidance of a carnivore odor by prey. *Proc Natl Acad Sci*  
444 **108**:11235–11240. doi:10.1073/pnas.1103317108
- 445 Gautam SH, Verhagen J V. 2012. Retronasal Odor Representations in the Dorsal Olfactory Bulb  
446 of Rats. *J Neurosci* **32**:7949–7959. doi:10.1523/JNEUROSCI.1413-12.2012
- 447 Ghosh S, Larson SD, Hefzi H, Marnoy Z, Cutforth T, Dokka K, Baldwin KK. 2011. Sensory  
448 maps in the olfactory cortex defined by long-range viral tracing of single neurons. *Nature*  
449 **472**:217–220. doi:10.1038/nature09945
- 450 Halabisky B, Friedman D, Radojicic M, Strowbridge BW. 2000. Calcium influx through NMDA  
451 receptors directly evokes GABA release in olfactory bulb granule cells. *J Neurosci* **20**:5124–  
452 34.
- 453 Helmchen F, Svoboda K, Denk W, Tank DW. 1999. In vivo dendritic calcium dynamics in deep-  
454 layer cortical pyramidal neurons. *Nat Neurosci* **2**:989–996. doi:10.1038/14788
- 455 Homma R, Lv X, Sato T, Imamura F, Zeng S, Nagayama S. 2019. Narrowly Confined and  
456 Glomerulus-Specific Onset Latencies of Odor-Evoked Calcium Transients in the  
457 Juxtglomerular Cells of the Mouse Main Olfactory Bulb. *eneuro* **6**:ENEURO.0387-  
458 18.2019. doi:10.1523/ENEURO.0387-18.2019
- 459 Huang L, Garcia I, Jen H-I, Arenkiel BR. 2013. Reciprocal connectivity between mitral cells and  
460 external plexiform layer interneurons in the mouse olfactory bulb. *Front Neural Circuits*  
461 **7**:32. doi:10.3389/fncir.2013.00032

- 462 Igarashi KM, Ieki N, An M, Yamaguchi Y, Nagayama S, Kobayakawa K, Kobayakawa R,  
463 Tanifuji M, Sakano H, Chen WR, Mori K. 2012. Parallel mitral and tufted cell pathways  
464 route distinct odor information to different targets in the olfactory cortex. *J Neurosci*  
465 **32**:7970–85. doi:10.1523/JNEUROSCI.0154-12.2012
- 466 Inaki K, Takahashi YKYK, Nagayama S, Mori K. 2002. Molecular-feature domains with  
467 posterodorsal-anteroventral polarity in the symmetrical sensory maps of the mouse olfactory  
468 bulb: Mapping of odourant-induced Zif268 expression. *Eur J Neurosci* **15**:1563–74.  
469 doi:10.1046/j.1460-9568.2002.01991.x
- 470 Ito J, Roy S, Liu Y, Cao Y, Fletcher M, Lu L, Boughter JD, Grün S, Heck DH. 2014. Whisker  
471 barrel cortex delta oscillations and gamma power in the awake mouse are linked to  
472 respiration. *Nat Commun* **5**:3572. doi:10.1038/ncomms4572
- 473 Johnson BA, Farahbod H, Leon M. 2005. Interactions between odorant functional group and  
474 hydrocarbon structure influence activity in glomerular response modules in the rat olfactory  
475 bulb. *J Comp Neurol* **483**:205–216. doi:10.1002/cne.20409
- 476 Johnson BA, Farahbod H, Xu Z, Saber S, Leon M. 2004. Local and global chemotopic  
477 organization: general features of the glomerular representations of aliphatic odorants  
478 differing in carbon number. *J Comp Neurol* **480**:234–49. doi:10.1002/cne.20335
- 479 Johnson BA, Leon M. 2000. Modular representations of odorants in the glomerular layer of the  
480 rat olfactory bulb and the effects of stimulus concentration. *J Comp Neurol* **422**:496–509.
- 481 Johnson BA, Leon M. 1996. Spatial distribution of [<sup>14</sup>C]2-deoxyglucose uptake in the  
482 glomerular layer of the rat olfactory bulb following early odor preference learning. *J Comp*  
483 *Neurol* **376**:557–66. doi:10.1002/(SICI)1096-9861(19961223)376:4<557::AID-  
484 CNE5>3.0.CO;2-0

- 485 Johnson BA, Woo CC, Duong H, Nguyen V, Leon M. 1995. A learned odor evokes an enhanced  
486 Fos-like glomerular response in the olfactory bulb of young rats. *Brain Res* **699**:192–200.
- 487 Johnson BA, Woo CC, Hingco EE, Pham KL, Leon M. 1999. Multidimensional chemotopic  
488 responses to n-aliphatic acid odorants in the rat olfactory bulb. *J Comp Neurol* **409**:529–48.
- 489 Johnson BA, Xu Z, Ali SS, Leon M. 2009. Spatial representations of odorants in olfactory bulbs  
490 of rats and mice: Similarities and differences in chemotopic organization. *J Comp Neurol*  
491 **514**:658–673. doi:10.1002/cne.22046
- 492 Johnson MA, Tsai L, Roy DS, Valenzuela DH, Mosley C, Magklara A, Lomvardas S, Liberles  
493 SD, Barnea G. 2012. Neurons expressing trace amine-associated receptors project to discrete  
494 glomeruli and constitute an olfactory subsystem. *Proc Natl Acad Sci* **109**:13410–13415.  
495 doi:10.1073/pnas.1206724109
- 496 Kandel ER, Jessell TM, Schwartz JH, Siegelbaum SA, Hudspeth AJ. 2013. Principles of Neural  
497 Science, Fifth Edition, Principles of Neural Science. McGraw-Hill Education.
- 498 Kikuta S, Fletcher ML, Homma R, Yamasoba T, Nagayama S. 2013. Odorant Response  
499 Properties of Individual Neurons in an Olfactory Glomerular Module. *Neuron* **77**.  
500 doi:10.1016/j.neuron.2013.01.022
- 501 Kimbell JS, Godo MN, Gross EA, Joyner DR, Richardson RB, Morgan KT. 1997. Computer  
502 Simulation of Inspiratory Airflow in All Regions of the F344 Rat Nasal Passages. *Toxicol*  
503 *Appl Pharmacol* **145**:388–398. doi:10.1006/TAAP.1997.8206
- 504 Kiyokage E, Pan Y-Z, Shao Z, Kobayashi K, Szabo G, Yanagawa Y, Obata K, Okano H, Toida  
505 K, Puche AC, Shipley MT. 2010. Molecular Identity of Periglomerular and Short Axon  
506 Cells. *J Neurosci* **30**:1185–1196. doi:10.1523/JNEUROSCI.3497-09.2010
- 507 Li J, Ishii T, Feinstein P, Mombaerts P. 2004. Odorant receptor gene choice is reset by nuclear

- 508 transfer from mouse olfactory sensory neurons. *Nature* **428**:393–399.
- 509 doi:10.1038/nature02433
- 510 Liberles SD. 2015. Trace amine-associated receptors: Ligands, neural circuits, and behaviors.
- 511 *Curr Opin Neurobiol*. doi:10.1016/j.conb.2015.01.001
- 512 Liberles SD, Buck LB. 2006. A second class of chemosensory receptors in the olfactory
- 513 epithelium. *Nature* **442**:645–650. doi:10.1038/nature05066
- 514 Lockmann AL V, Laplagne DA, Leão RN, Tort ABL. 2016. A Respiration-Coupled Rhythm in
- 515 the Rat Hippocampus Independent of Theta and Slow Oscillations. *J Neurosci* **36**:5338–52.
- 516 doi:10.1523/JNEUROSCI.3452-15.2016
- 517 Lodovichi C, Belluscio L, Katz LC. 2003. Functional topography of connections linking mirror-
- 518 symmetric maps in the mouse olfactory bulb. *Neuron* **38**:265–76.
- 519 Marks CA, Cheng K, Cummings DM, Belluscio L. 2006. Activity-dependent plasticity in the
- 520 olfactory intrabulbar map. *J Neurosci* **26**:11257–66. doi:10.1523/JNEUROSCI.2805-
- 521 06.2006
- 522 Miyamichi K, Amat F, Moussavi F, Wang C, Wickersham I, Wall NR, Taniguchi H, Tasic B,
- 523 Huang ZJ, He Z, Callaway EM, Horowitz MA, Luo L. 2011. Cortical representations of
- 524 olfactory input by trans-synaptic tracing. *Nature* **472**:191–196. doi:10.1038/nature09714
- 525 Miyamichi K, Serizawa S, Kimura HM, Sakano H. 2005. Cellular/Molecular Continuous and
- 526 Overlapping Expression Domains of Odorant Receptor Genes in the Olfactory Epithelium
- 527 Determine the Dorsal/Ventral Positioning of Glomeruli in the Olfactory Bulb.
- 528 doi:10.1523/JNEUROSCI.0324-05.2005
- 529 Mizuguchi R, Naritsuka H, Mori K, Yoshihara Y, Klein WH, Yoshihara Y. 2012. Tbr2
- 530 Deficiency in Mitral and Tufted Cells Disrupts Excitatory-Inhibitory Balance of Neural



- 531        Circuitry in the Mouse Olfactory Bulb. *J Neurosci* **32**:8831–8844.
- 532        doi:10.1523/JNEUROSCI.5746-11.2012
- 533        Moberly AH, Schreck M, Bhattarai JP, Zweifel LS, Luo W, Ma M. 2018. Olfactory inputs
- 534        modulate respiration-related rhythmic activity in the prefrontal cortex and freezing behavior.
- 535        *Nat Commun* **9**:1528. doi:10.1038/s41467-018-03988-1
- 536        Mombaerts P, Wang F, Dulac C, Chao SK, Nemes A, Mendelsohn M, Edmondson J, Axel R.
- 537        1996. Visualizing an olfactory sensory map. *Cell* **87**:675–86.
- 538        Mori K, Takahashi YK, Igarashi KM, Yamaguchi M. 2006. Maps of Odorant Molecular Features
- 539        in the Mammalian Olfactory Bulb. *Physiol Rev* **86**:409–433.
- 540        doi:10.1152/physrev.00021.2005
- 541        Nagai Y, Sano H, Yokoi M. 2005. Transgenic expression of Cre recombinase in mitral/tufted
- 542        cells of the olfactory bulb. *Genesis* **43**:12–6. doi:10.1002/gene.20146
- 543        Nagao H, Yamaguchi M, Takahashi Y, Mori K. 2002. Grouping and representation of odorant
- 544        receptors in domains of the olfactory bulb sensory map. *Microsc Res Tech* **58**:168–75.
- 545        doi:10.1002/jemt.10146
- 546        Nagao H, Yoshihara Y, Mitsui S, Fujisawa H, Mori K. 2000. Two mirror-image sensory maps
- 547        with domain organization in the mouse main olfactory bulb. *Neuroreport* **11**:3023–7.
- 548        doi:10.1097/00001756-200009110-00039
- 549        Nagayama S, Enerva A, Fletcher ML, Masurkar AV, Igarashi KM, Mori K, Chen WR. 2010.
- 550        Differential axonal projection of mitral and tufted cells in the mouse main olfactory system.
- 551        *Front Neural Circuits* **4**. doi:10.3389/fncir.2010.00120
- 552        Nagayama S, Zeng S, Xiong W, Fletcher ML, Masurkar AV, Davis DJ, Pieribone VA, Chen
- 553        WR. 2007. In Vivo Simultaneous Tracing and Ca<sup>2+</sup> Imaging of Local Neuronal Circuits.

- 554 *Neuron* **53**:789–803. doi:10.1016/j.neuron.2007.02.018
- 555 Nguyen Chi V, Müller C, Wolfenstetter T, Yanovsky Y, Draguhn A, Tort ABL, Brankačk J.  
556 2016. Hippocampal Respiration-Driven Rhythm Distinct from Theta Oscillations in Awake  
557 Mice. *J Neurosci* **36**:162–77. doi:10.1523/JNEUROSCI.2848-15.2016
- 558 Pacifico R, Dewan A, Cawley D, Guo C, Bozza T. 2012. An Olfactory Subsystem that Mediates  
559 High-Sensitivity Detection of Volatile Amines. *Cell Rep* **2**:76–88.  
560 doi:10.1016/j.celrep.2012.06.006
- 561 Phillips ME, Sachdev RNS, Willhite DC, Shepherd GM. 2012. Respiration drives network  
562 activity and modulates synaptic and circuit processing of lateral inhibition in the olfactory  
563 bulb. *J Neurosci* **32**:85–98. doi:10.1523/JNEUROSCI.4278-11.2012
- 564 Schindelin J, Arganda-Carreras I, Frise E, Kaynig V, Longair M, Pietzsch T, Preibisch S,  
565 Rueden C, Saalfeld S, Schmid B, Tinevez J-Y, White DJ, Hartenstein V, Eliceiri K,  
566 Tomancak P, Cardona A. 2012. Fiji: an open-source platform for biological-image analysis.  
567 *Nat Methods* **9**:676–82. doi:10.1038/nmeth.2019
- 568 Schoenfeld TA, Cleland TA. 2006. Anatomical Contributions to Odorant Sampling and  
569 Representation in Rodents: Zoning in on Sniffing Behavior. *Chem Senses* **31**:131–144.  
570 doi:10.1093/chemse/bjj015
- 571 Schoenfeld TA, Marchand JE, Macrides F. 1985. Topographic organization of tufted cell axonal  
572 projections in the hamster main olfactory bulb: An intrabulbar associational system. *J Comp*  
573 *Neurol* **235**:503–518. doi:10.1002/cne.902350408
- 574 Shepherd GM. 2012. Neurogastronomy : how the brain creates flavor and why it matters.  
575 Columbia University Press.
- 576 Shusterman R, Smear MC, Koulakov AA, Rinberg D. 2011. Precise olfactory responses tile the

- 577 sniff cycle. *Nat Neurosci* **14**:1039–44. doi:10.1038/nn.2877
- 578 Sosulski DL, Bloom ML, Cutforth T, Axel R, Datta SR. 2011. Distinct representations of  
579 olfactory information in different cortical centres. *Nature* **472**:213–216.  
580 doi:10.1038/nature09868
- 581 Spors H, Grinvald A. 2002. Spatio-temporal dynamics of odor representations in the mammalian  
582 olfactory bulb. *Neuron* **34**:301–15.
- 583 Svoboda K, Helmchen F, Denk W, Tank DW. 1999. Spread of dendritic excitation in layer 2/3  
584 pyramidal neurons in rat barrel cortex in vivo. *Nat Neurosci* **2**:65–73. doi:10.1038/4569
- 585 Taniguchi H, He M, Wu P, Kim S, Paik R, Sugino K, Kvitsiani D, Kvitsani D, Fu Y, Lu J, Lin  
586 Y, Miyoshi G, Shima Y, Fishell G, Nelson SB, Huang ZJ. 2011. A resource of Cre driver  
587 lines for genetic targeting of GABAergic neurons in cerebral cortex. *Neuron* **71**:995–1013.  
588 doi:10.1016/j.neuron.2011.07.026
- 589 Taniguchi M, Nagao H, Takahashi YK, Yamaguchi M, Mitsui S, Yagi T, Mori K, Shimizu T.  
590 2003. Distorted odor maps in the olfactory bulb of semaphorin 3A-deficient mice. *J*  
591 *Neurosci* **23**:1390–7.
- 592 Tian L, Hires SA, Mao T, Huber D, Chiappe ME, Chalasani SH, Petreanu L, Akerboom J,  
593 McKinney SA, Schreiter ER, Bargmann CI, Jayaraman V, Svoboda K, Looger LL. 2009.  
594 Imaging neural activity in worms, flies and mice with improved GCaMP calcium indicators.  
595 *Nat Methods* **6**:875–881. doi:10.1038/nmeth.1398
- 596 Uchida N, Poo C, Haddad R. 2014. Coding and Transformations in the Olfactory System. *Annu*  
597 *Rev Neurosci* **37**:363–385. doi:10.1146/annurev-neuro-071013-013941
- 598 Wachowiak M, Economo MN, Diaz-Quesada M, Brunert D, Wesson DW, White JA, Rothermel  
599 M. 2013. Optical Dissection of Odor Information Processing In Vivo Using GCaMPs

- 600 Expressed in Specified Cell Types of the Olfactory Bulb. *J Neurosci* **33**:5285–5300.  
601 doi:10.1523/JNEUROSCI.4824-12.2013
- 602 Wilson RI, Mainen ZF. 2006. EARLY EVENTS IN OLFACTORY PROCESSING. *Annu Rev*  
603 *Neurosci* **29**:163–201. doi:10.1146/annurev.neuro.29.051605.112950
- 604 Yan Z, Tan J, Qin C, Lu Y, Ding C, Luo M. 2008. Precise circuitry links bilaterally symmetric  
605 olfactory maps. *Neuron* **58**:613–24. doi:10.1016/j.neuron.2008.03.012
- 606 Yanovsky Y, Ciatipis M, Draguhn A, Tort ABL, Brankak J. 2014. Slow Oscillations in the  
607 Mouse Hippocampus Entrained by Nasal Respiration. *J Neurosci* **34**:5949–5964.  
608 doi:10.1523/JNEUROSCI.5287-13.2014
- 609 Zapiec B, Mombaerts P. 2015. Multiplex assessment of the positions of odorant receptor-specific  
610 glomeruli in the mouse olfactory bulb by serial two-photon tomography. *PNAS*  
611 **112**:E58732–82. doi:10.1073/pnas.1512135112
- 612 Zariwala HA, Borghuis BG, Hoogland TM, Madisen L, Tian L, De Zeeuw CI, Zeng H, Looger  
613 LL, Svoboda K, Chen T-W. 2012. A Cre-dependent GCaMP3 reporter mouse for neuronal  
614 imaging in vivo. *J Neurosci* **32**:3131–41. doi:10.1523/JNEUROSCI.4469-11.2012
- 615 Zhang J, Pacifico R, Cawley D, Feinstein P, Bozza T. 2013. Ultrasensitive Detection of Amines  
616 by a Trace Amine-Associated Receptor. *J Neurosci* **33**:3228–3239.  
617 doi:10.1523/JNEUROSCI.4299-12.2013
- 618 Zhao K, Dalton P, Yang GC, Scherer PW. 2006. Numerical Modeling of Turbulent and Laminar  
619 Airflow and Odorant Transport during Sniffing in the Human and Rat Nose. *Chem Senses*  
620 **31**:107–118. doi:10.1093/chemse/bjj008
- 621 Zhou Z, Belluscio L. 2012. Coding odorant concentration through activation timing between the  
622 medial and lateral olfactory bulb. *Cell Rep* **2**:1143–50. doi:10.1016/j.celrep.2012.09.035

623 Zhou Z, Belluscio L. 2008. Intrabulbar projecting external tufted cells mediate a timing-based  
624 mechanism that dynamically gates olfactory bulb output. *J Neurosci* **28**:9920–8.  
625 doi:10.1523/JNEUROSCI.3082-08.2008  
626
